# Supplementary material
Source: publisher site journal article supplement (https://www.spandidos-publications.com/4282/downloadSupplementary)
Supplement: Supplementary file 1 [file downloadSupplementary]

Table SI. Sequences of primers used in this study.

| Name              | Primers (5'-3')         |
|-------------------|-------------------------|
| GeneChem,         | F: ACACCATGGGAGCTGGTAAT |
| <i>Mycoplasma</i> | R: CTCATCGACTTCCAGACCC  |

F, forward, R, reverse.

Table SII. Oligonucleotide sequences for shRNA.

| Target gene | Code    | Sequence              |
|-------------|---------|-----------------------|
| PNO1        | 14767   | GATACACACCATTGAAAGAAA |
|             | 14768   | GCTGAACAATTCAGTCATT   |
|             | 14769   | GCAATATTCGAGCTGTGGCTA |
| Control     | sh-Ctrl | TTCTCCGAACGTGTCACGT   |

Lentiviruses encoding shRNA targeting PNO1 and control shRNA were designed, synthesized and packaged by Shanghai GeneChem Co., Ltd. All oligonucleotides were double-stranded. In the case of shRNAs, only the 5'-3' strand is shown. sh-, short hairpin.

Table SIII. Association between PNO1 expression and clinicopathological characteristics of patients with breast cancer.

| Characteristics | Total (N=144) | PNO1 protein expression |             | P-value |
|-----------------|---------------|-------------------------|-------------|---------|
|                 |               | Low (n=124)             | High (n=20) |         |
| Age             |               |                         |             |         |
| ≤51             | 75 (52.1%)    | 66 (45.8%)              | 9 (6.3%)    | 0.498   |
| >51             | 69 (47.9%)    | 58 (40.3%)              | 11 (7.6%)   |         |
| Pathology stage |               |                         |             |         |
| I               | 36 (25.0%)    | 32 (22.2%)              | 4 (2.8%)    | 0.644   |
| II              | 107 (74.3%)   | 91 (63.2%)              | 16 (11.1%)  |         |
| III             | 1 (0.7%)      | 1 (0.7%)                | 0 (0.0%)    |         |
| Tumor size      |               |                         |             |         |
| ≤5 cm           | 130 (90.3%)   | 111 (77.1%)             | 19 (13.2%)  | 0.446   |
| >5 cm           | 14 (9.7%)     | 13 (9.0%)               | 1 (0.7%)    |         |
| TNM stage       |               |                         |             |         |
| I-II            | 95 (66.0%)    | 80 (55.6%)              | 15 (10.4%)  | 0.362   |
| III-IV          | 49 (34.1%)    | 44 (30.6%)              | 5 (3.5%)    |         |
| ER status       |               |                         |             |         |
| Negative        | 42 (29.2%)    | 36 (25.0%)              | 6 (4.2%)    | 0.981   |
| Positive        | 90 (62.5%)    | 77 (53.5%)              | 26 (18.1%)  |         |
| PR status       |               |                         |             |         |
| Negative        | 52 (36.1%)    | 44 (30.6%)              | 8 (5.6%)    | 0.818   |
| Positive        | 79 (54.9%)    | 68 (47.2%)              | 11 (7.6%)   |         |
| HER2 status     |               |                         |             |         |
| Negative        | 89 (61.8%)    | 74 (51.4%)              | 15 (10.4%)  | 0.232   |
| Positive        | 44 (30.6%)    | 40 (27.8%)              | 4 (2.8%)    |         |

PNO1, partner of NOB1 homolog; BC, breast cancer; ER, estrogen receptor; PR, progesterone receptor; HER2, human epidermal growth factor receptor 2.
